# Supplementary material for: Reactions of metalloalkynes. New C2 bonding mode in a trimetallic complexElectronic supplementary information (ESI) available: Synthesis and characterisation of complexes 4a and 4b. See http://www.rsc.org/suppdata/cc/b1/b110930h/This paper constitutes Part 4 of the series.
Source: Royal Society of Chemistry journal article supplement (doi:10.1039/b110930h), 2002-08-27
Supplement: b110930h.doc [file b110930h.doc]

Reactions of Metalloalkynes. New C2 Bonding Mode in a Trimetallic Complex.

Christopher S. Griffith, George A. Koutsantonis**,a*, Brian W Skelton and Allan H. White

Department of Chemistry, University of Western Australia, Perth, Australia, 6009.

a E-mail: gak@chem.uwa.edu.au.

**Supplementary Material (ESI) for Chemical Communications**

**This journal is © The Royal Society of Chemistry 2002**

**Syntheses of Complexes**

*Alternative Syntheses of [{Ru(CO)2(-C5H4R)}3(3-CC)](BF4),* ***4****.*

(1) A mixture of [Ru(CO)2(-C5H5)Cl] (20 mg, 0.078 mmol) and [Ag3({Ru(CO)2(-C5H5)}2(2-CC))3](BF4)3 (**a**) (25 mg, 0.013 mmol) in methylene chloride (20 mL) was stirred at reflux (10 hr). The cooled reaction mixture was then filtered through Celite and the volume reduced *ca*. 2 mL, with addition of diethyl ether (10 mL) giving an orange powder of **2a** (18 mg, 85%) of the crude product. Subsequent recrystallisation (CH2Cl2/Et2O vap. diff.)

IR (CH2Cl2) v(CO) 2056 m, 2049 sh, 2003 s;

1H NMR(d6-acetone) 5.80 (s, C5*H*5);

13C NMR(d6-acetone) 206.0 (s, *C*O), 91.3 (s, *C*5H5);

MS (FAB) *m/z* 692 ([M – (BF4)]+, 100%), 664 – 608 ([M – (CO)*x*(BF4)]+ *x* = 1 - 3;

Anal. Calcd. for C23H15B1F4O6Ru3: C, 35.52; H, 1.94.

Found: C, 35.63; H, 1.91Crystal data for **4a**:Space group = , *Z* = 2, *a* = 14.292(3) Å, *b* = 10.397(3) Å, *c* = 9.281(3) Å, ** = 93.04(3)˚, ** = 103.04(2)˚, ** = 107.29(2)˚, *V* = 1272.1(6) Å3, T = 300 K, 2**max = 56˚, Crystal Dimensions: 0.28 x 0.18 x 0.75 mm, **c = 2.029 g.cm-3, **(MoK) = 18.2 cm-1, *R, R´* = 0.052, 0.071.(2) A mixture of [Ru(CO)2(-C5H5)Cl] (46 mg, 0.178 mmol), [{Ru(CO)2(-C5H5)}2(2-CC)] (**1a**) (50 mg, 0.107 mmol) and [AgBF4] (19 mg, 0.100 mmol) in methylene chloride (20 mL) was stirred for 48 hr. at ambient temperature. The reaction mixture was filtered through Celite and the volume reduced *ca*. 5 mL, with addition of diethyl ether (15 mL) giving an orange powder of **1a**(35 mg, 45%) which exhibited identical spectroscopic properties to that found for (1).*Synthesis of [{Ru(CO)2(-C5H4Me)}3(3-CC)](BF4) (****4b****).*(3) In a manner similar to (2) above, [Ru(CO)2(-C5H4Me)Cl] (26 mg, 0.096 mmol) and [Ag3({Ru(CO)2(-C5H4Me)}2(2-CC))3](BF4)3 (**1b**) (30 mg, 0.014 mmol) in dichloromethane (20 mL) gave a pale orange precipitate of **4b** (33 mg, 95%).

IR (CH2Cl2) v(CO) 2054 m, 2042 m, 1992 s; 1H NMR(d6-acetone) 5.70 (vt, 2H, C5*H*4Me), 5.61 (vt, 2H, C5*H*4Me), 2.09 (s, 3H, C5H4*Me*); 13C NMR (d6-acetone) 200.1 (s, *C*O), 114.9 (s, *C*i), 90.1 (s, *C*5H4Me), 88.2 (s, *C*5H4Me), 13.7 (s, C5H4*Me*); MS (FAB) *m/z* 734 ([M – (BF4)]+, 100%), 707 – 650 ([M – (CO)*x*(BF4)]+ *x* = 1 – 3, 497 ([M – (Ru(CO)2(C5H4Me)(BF4))]+, 6%); Anal. Calcd. for C26H21B1F4O6Ru3: C, 38.09; H, 2.58. Found: C, 37.81; H, 2.46.Crystal data for **4b**:Space group = , *Z* = 2, *a* = 9.448(1) Å, *b* = 10.278(1) Å, *c* = 15.302(2) Å, ** = 101.034(2)˚, ** = 104.171(2)˚, ** = 92.041(2)˚, *V* = 1408.8(4) Å3, T = 300 K, 2**max = 50˚, Crystal Dimensions: 0.45 x 0.28 x 0.4 mm, **c = 1.932 g.cm-3, **(MoK) = 16.5 cm-1, *R, R´* = 0.051, 0.051.
